# Supplementary material
Source: ML conference proceedings conference paper supplement (https://openreview.net/forum?id=A2rfALKFBg)

$[(7, 3) \rightarrow$   
 $(9, 9, \text{end}),$   
 $(7, 9) \rightarrow$   
 $(9, 9, \text{end})]$

$[(7, 3) \rightarrow$   
 $(8, 6, \text{end}),$   
 $(7, 9) \rightarrow$   
 $(8, 6, \text{end})]$

All four edges  
at once

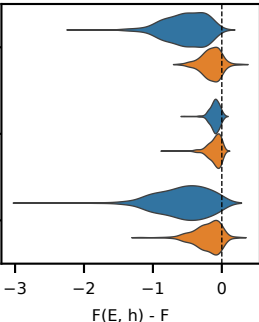

Supplement: supplementary_material [file attachment]
