# Supplementary material
Source: ML conference proceedings conference paper supplement (https://openreview.net/forum?id=A2rfALKFBg)

All (0, 11)  
outgoing edges

All (0, 9)  
outgoing edges

All (0, 11) +  
All (0, 9)  
outgoing edges

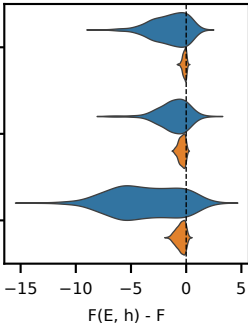

Supplement: supplementary_material [file attachment]

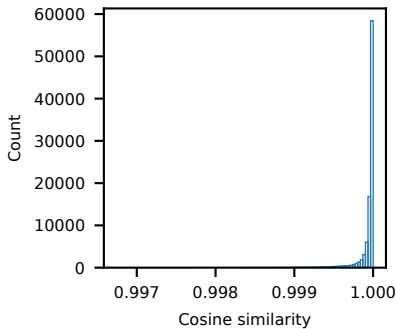

Supplement: supplementary_material [file attachment]

Metric value

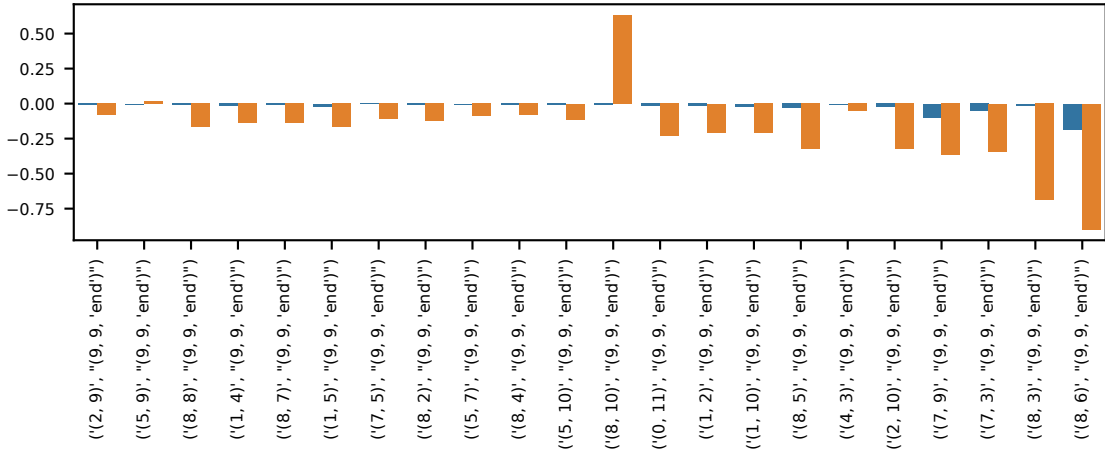

Supplement: supplementary_material [file attachment]

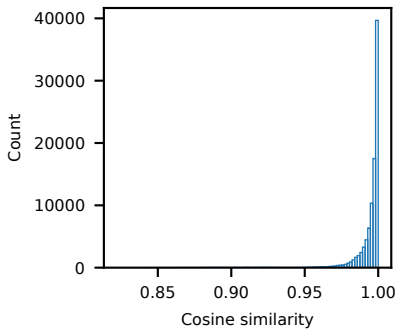

Supplement: supplementary_material [file attachment]

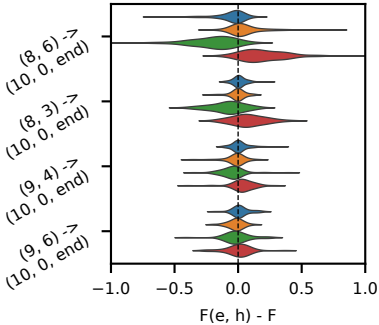

Supplement: supplementary_material [file attachment]

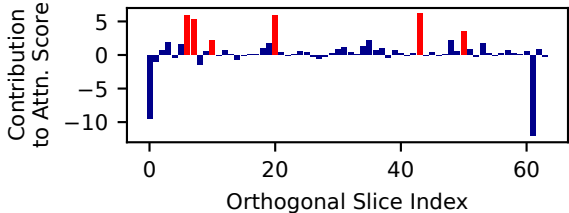

Supplement: supplementary_material [file attachment]

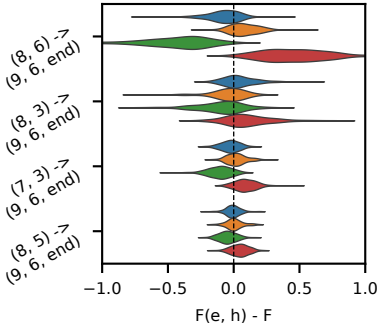

Supplement: supplementary_material [file attachment]

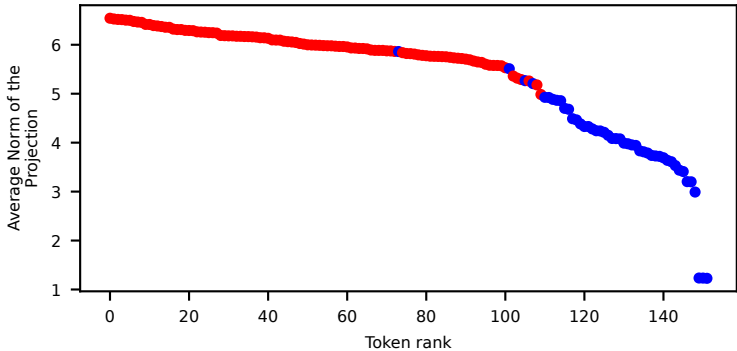

Supplement: supplementary_material [file attachment]

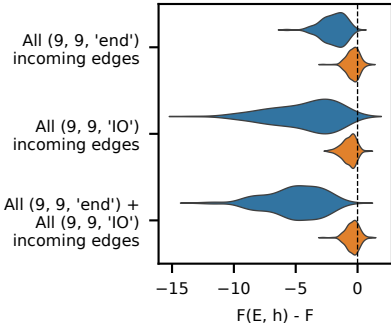

Supplement: supplementary_material [file attachment]

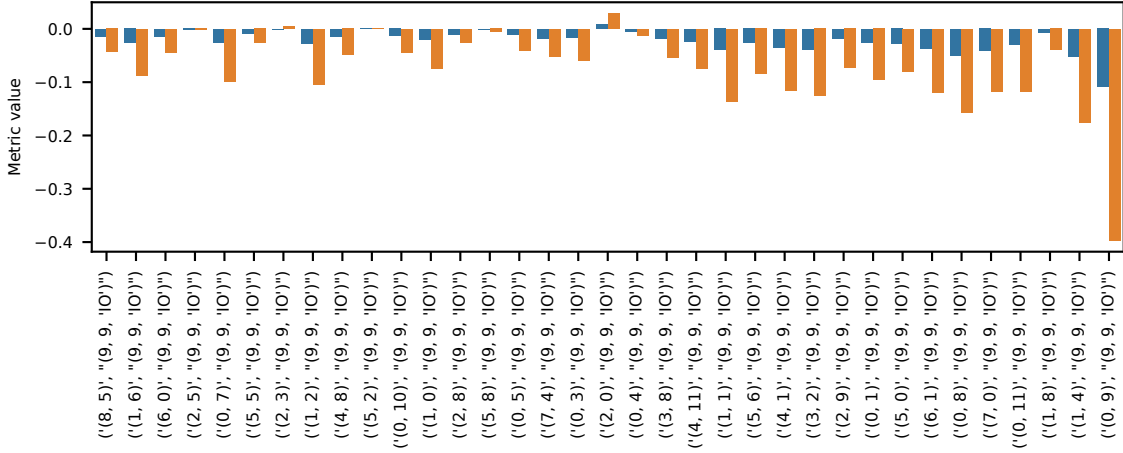

Supplement: supplementary_material [file attachment]

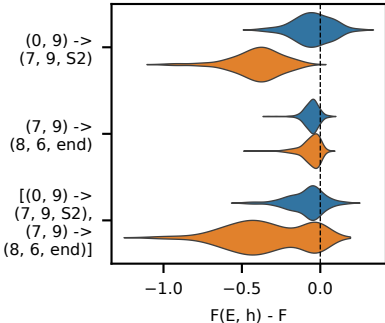

Supplement: supplementary_material [file attachment]

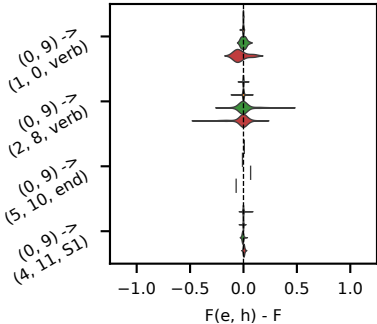

Supplement: supplementary_material [file attachment]

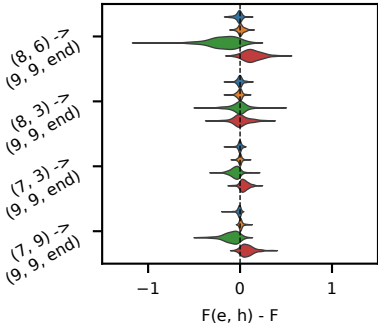

Supplement: supplementary_material [file attachment]

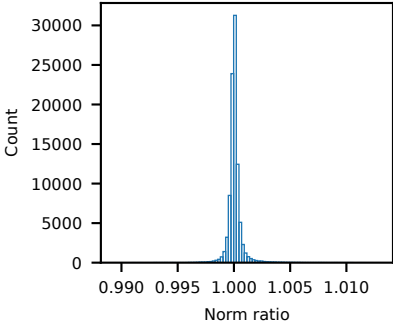

Supplement: supplementary_material [file attachment]

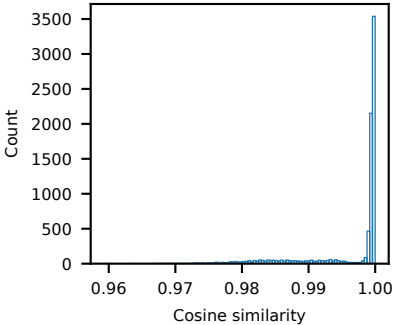

Supplement: supplementary_material [file attachment]

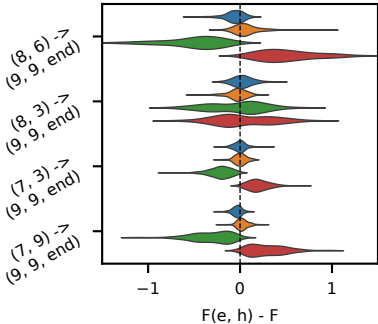

Supplement: supplementary_material [file attachment]

All (2, 8)  
outgoing edges

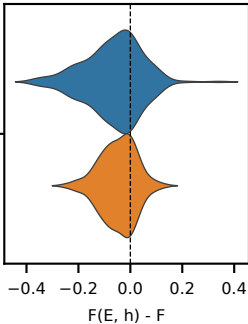

Supplement: supplementary_material [file attachment]

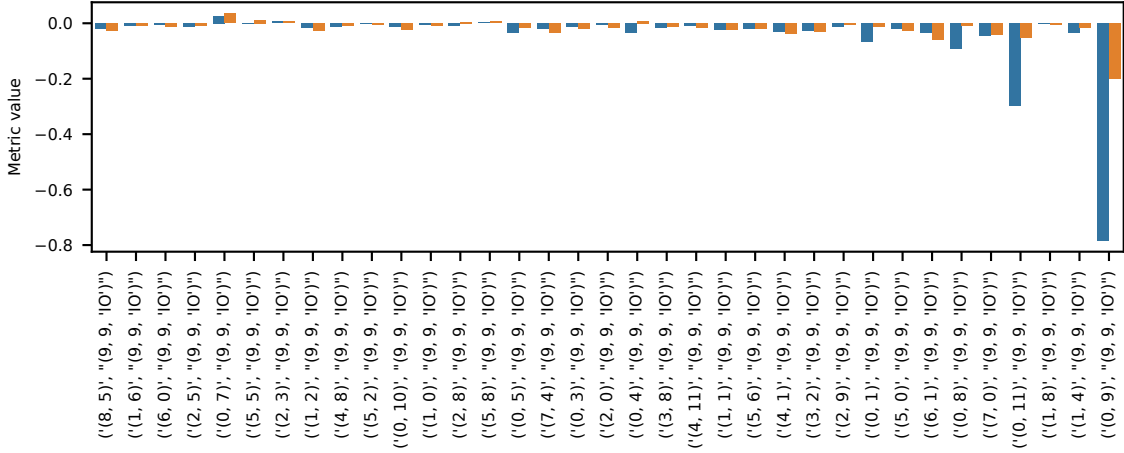

Supplement: supplementary_material [file attachment]

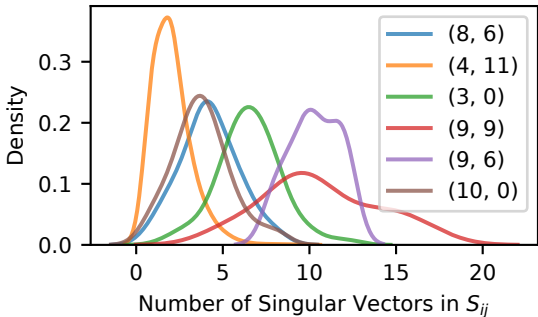

Supplement: supplementary_material [file attachment]

[(0, 11) ->  
(7, 9, end),  
(1, 4) ->  
(7, 9, end)]

(0, 9) ->  
(7, 9, S2)

[(0, 11) ->  
(7, 9, end),  
(1, 4) ->  
(7, 9, end),  
(0, 9) ->  
(7, 9, S2)]

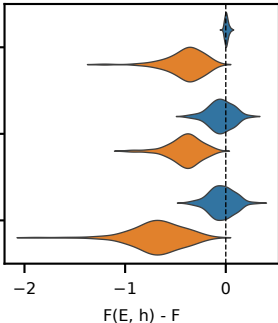

Supplement: supplementary_material [file attachment]

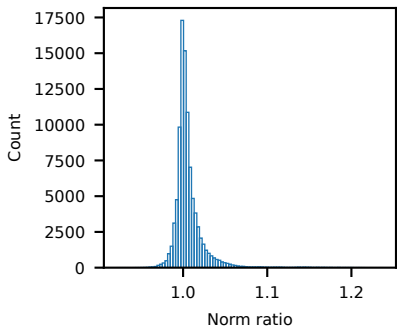

Supplement: supplementary_material [file attachment]

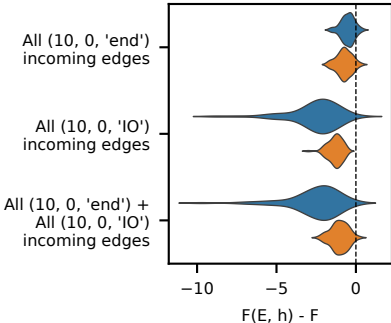

Supplement: supplementary_material [file attachment]

(0, 11) ->  
(7, 9, end)

(7, 9) ->  
(9, 9, end)

[(0, 11) ->  
(7, 9, end),  
(7, 9) ->  
(9, 9, end)]

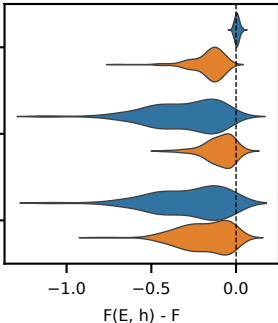

Supplement: supplementary_material [file attachment]

Metric value

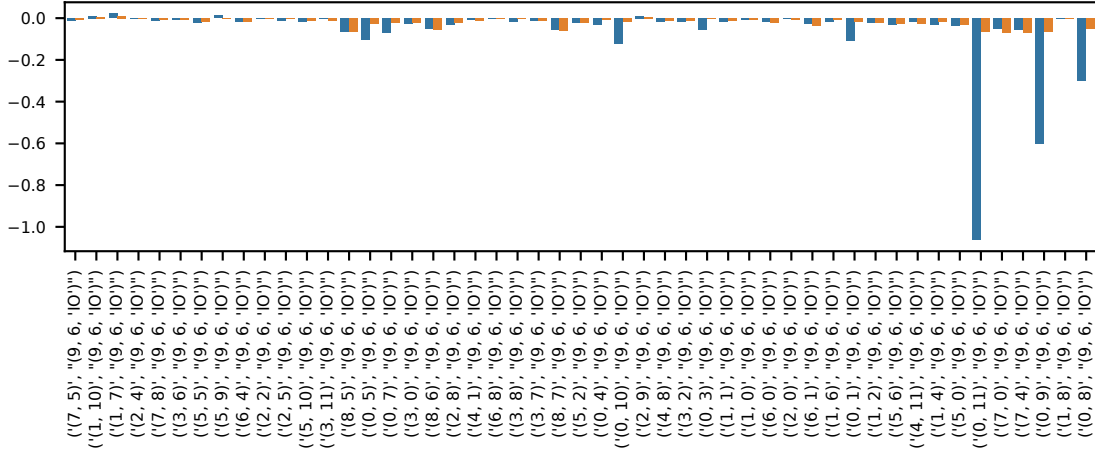

Supplement: supplementary_material [file attachment]

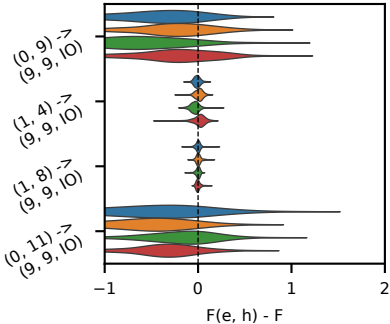

Supplement: supplementary_material [file attachment]

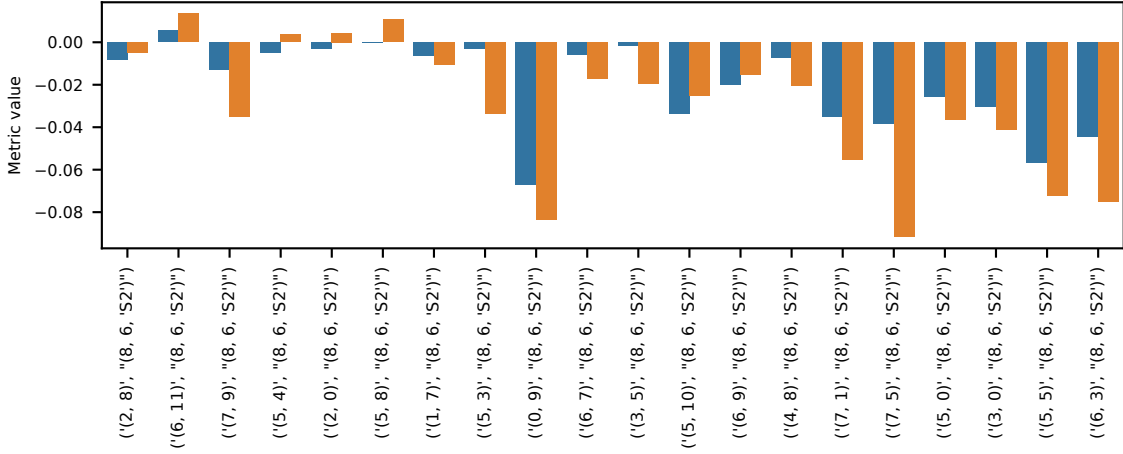

Supplement: supplementary_material [file attachment]

Metric value

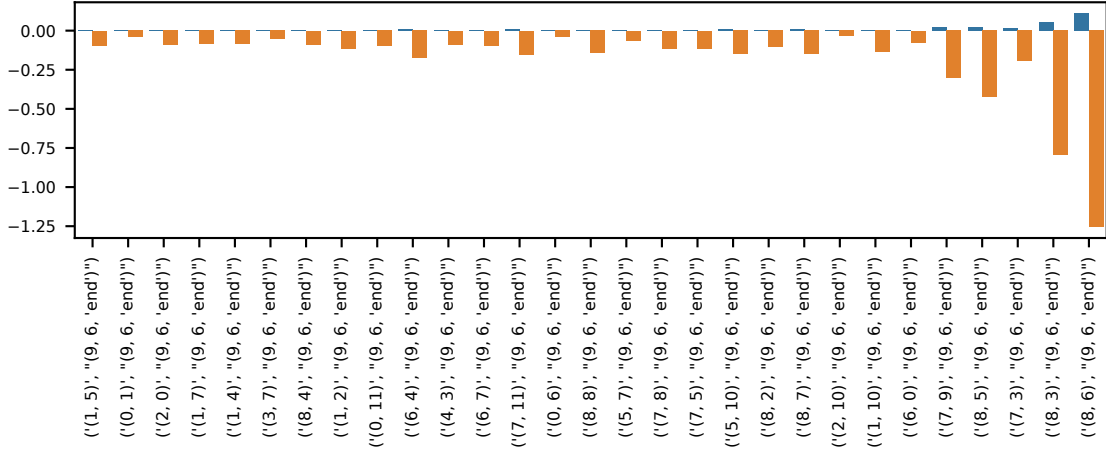

Supplement: supplementary_material [file attachment]

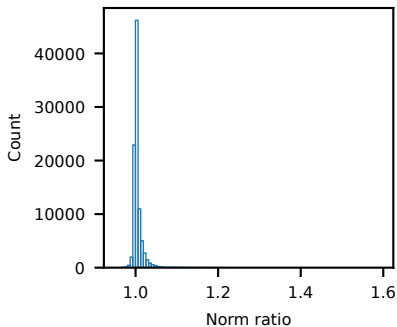

Supplement: supplementary_material [file attachment]

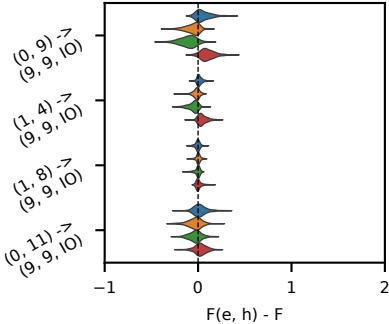

Supplement: supplementary_material [file attachment]

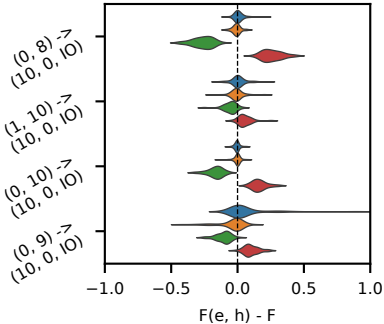

Supplement: supplementary_material [file attachment]

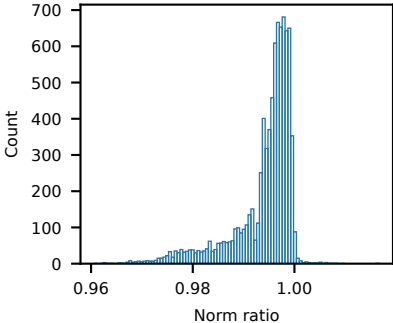

Supplement: supplementary_material [file attachment]

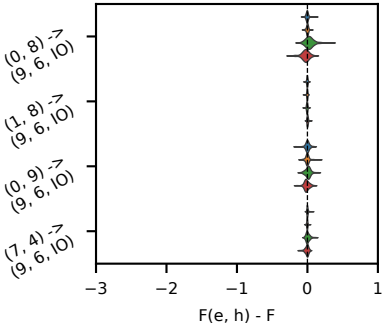

Supplement: supplementary_material [file attachment]

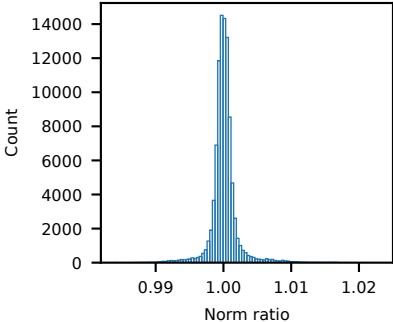

Supplement: supplementary_material [file attachment]

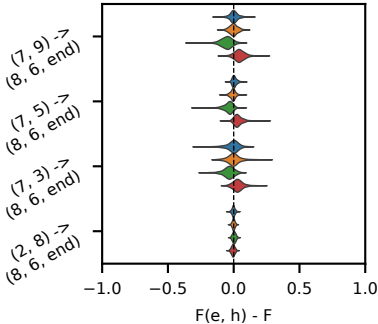

Supplement: supplementary_material [file attachment]

All (7, 9)  
outgoing edges

All (7, 3)  
outgoing edges

All (7, 9) +  
All (7, 3)  
outgoing edges

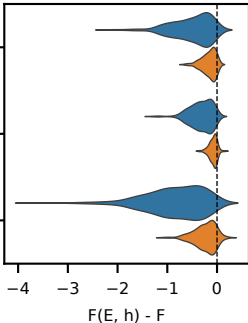

Supplement: supplementary_material [file attachment]

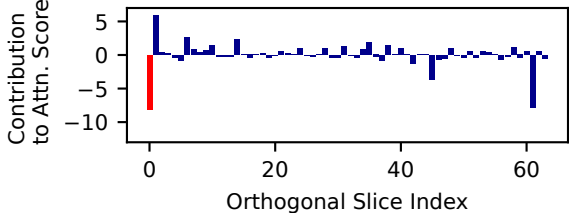

Supplement: supplementary_material [file attachment]

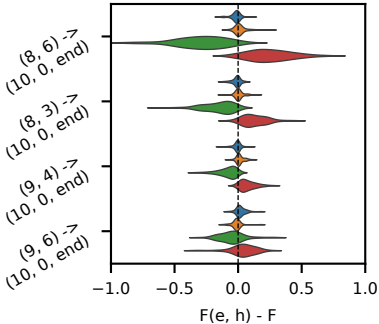

Supplement: supplementary_material [file attachment]

[(7, 9) ->  
(8, 6, end),  
(7, 9) ->  
(9, 9, end)]

[(7, 3) ->  
(8, 6, end),  
(7, 3) ->  
(9, 9, end)]

All four edges  
at once

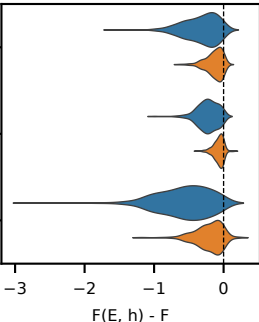

Supplement: supplementary_material [file attachment]

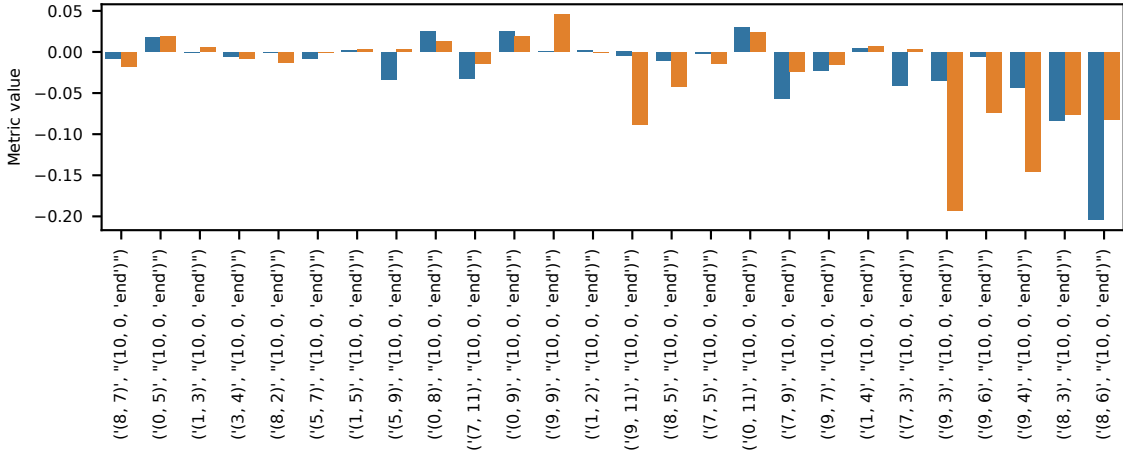

Supplement: supplementary_material [file attachment]

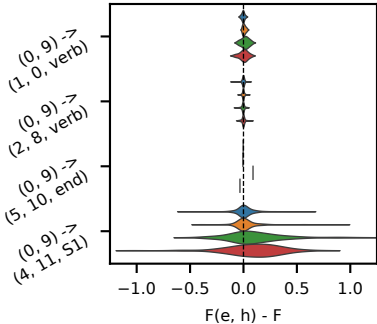

Supplement: supplementary_material [file attachment]

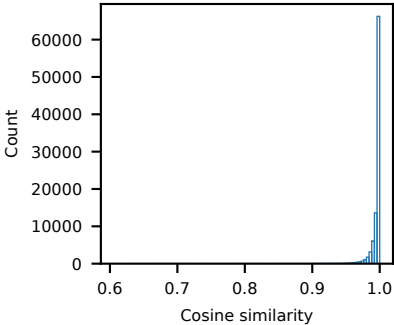

Supplement: supplementary_material [file attachment]

All (8, 6, 'end')  
incoming edges

All (8, 6, 'S2')  
incoming edges

All (8, 6, 'end') +  
All (8, 6, 'S2')  
incoming edges

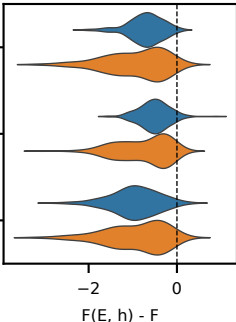

Supplement: supplementary_material [file attachment]

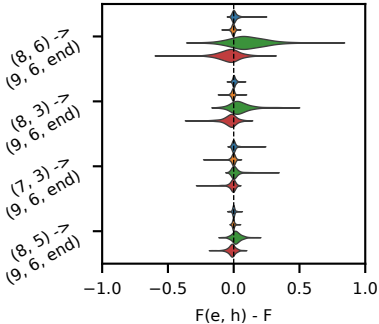

Supplement: supplementary_material [file attachment]

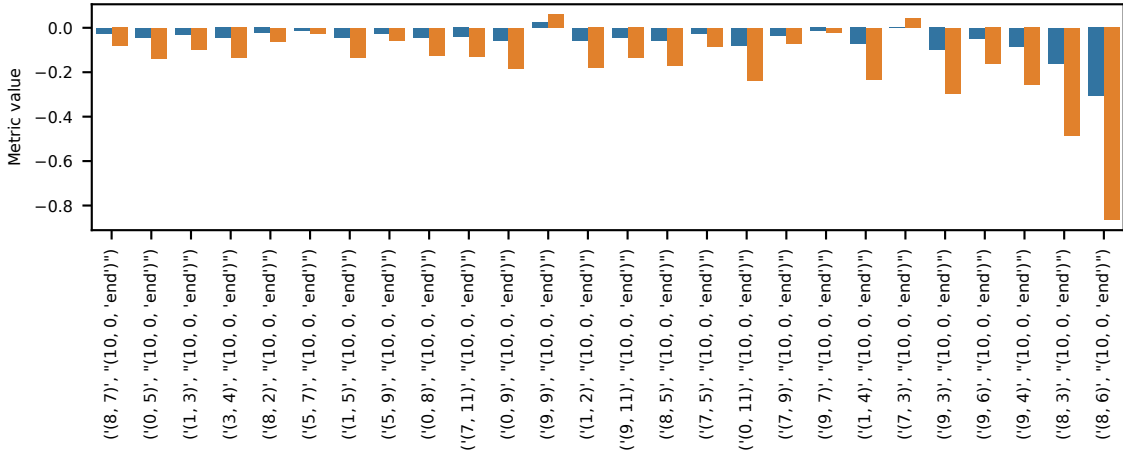

Supplement: supplementary_material [file attachment]

Metric value

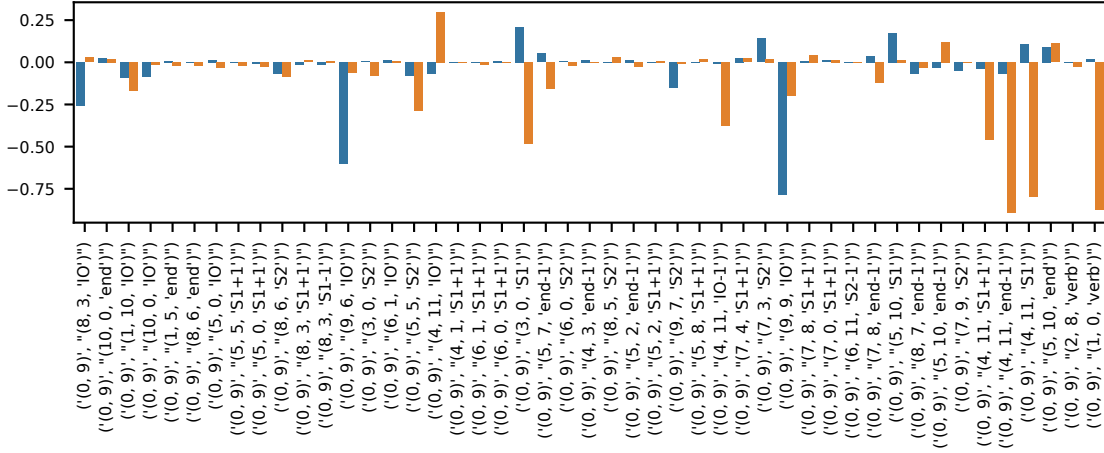

Supplement: supplementary_material [file attachment]

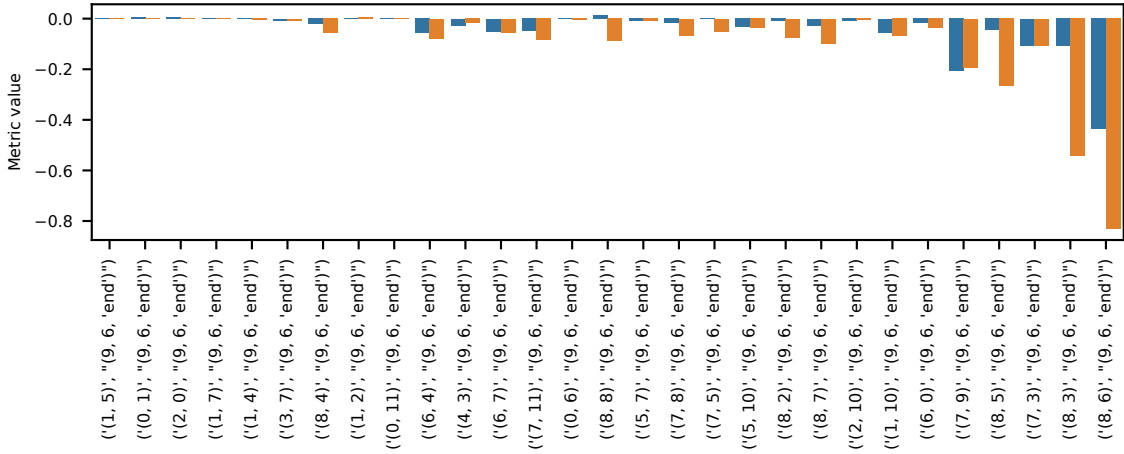

Supplement: supplementary_material [file attachment]

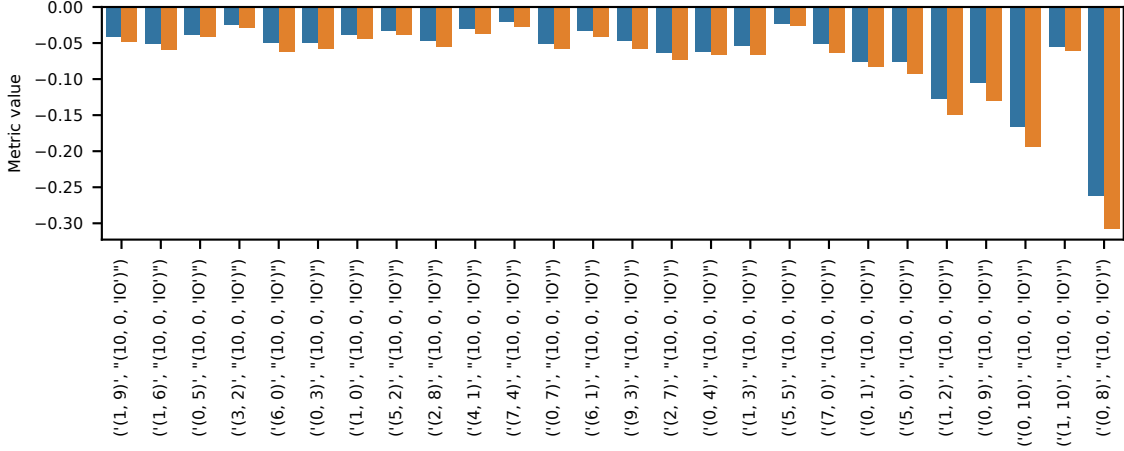

Supplement: supplementary_material [file attachment]

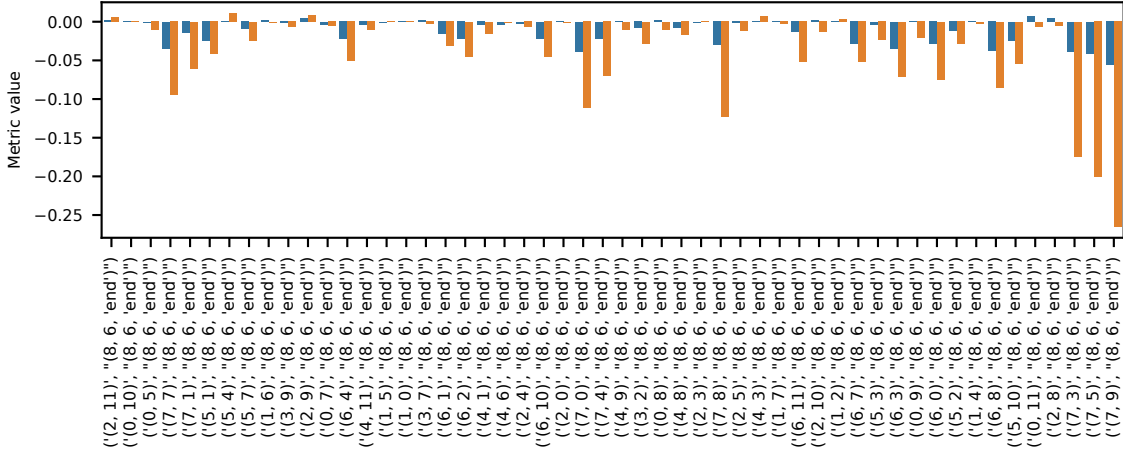

Supplement: supplementary_material [file attachment]

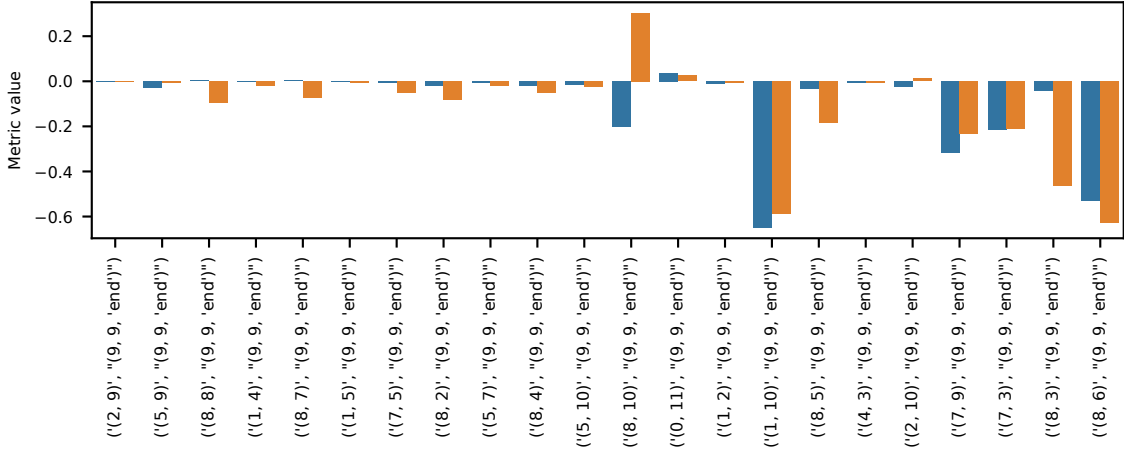

Supplement: supplementary_material [file attachment]

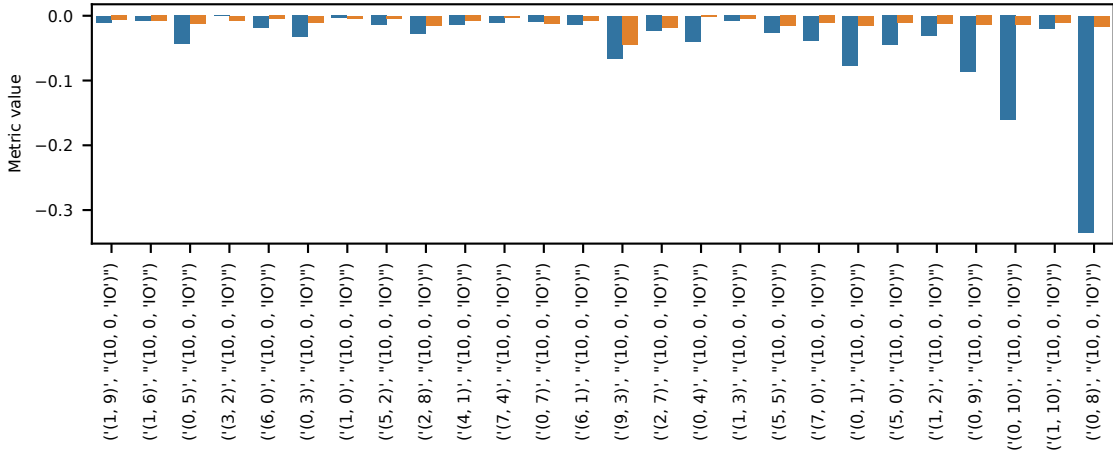

Supplement: supplementary_material [file attachment]

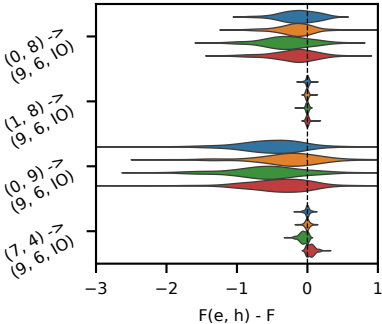

Supplement: supplementary_material [file attachment]

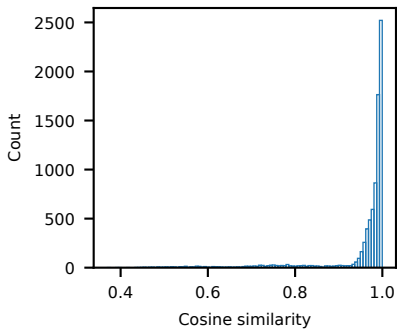

Supplement: supplementary_material [file attachment]

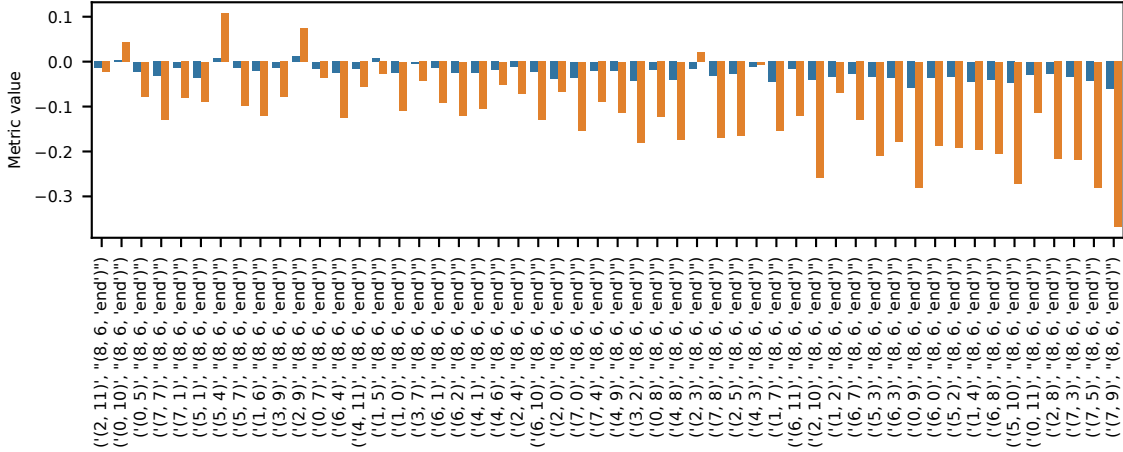

Supplement: supplementary_material [file attachment]

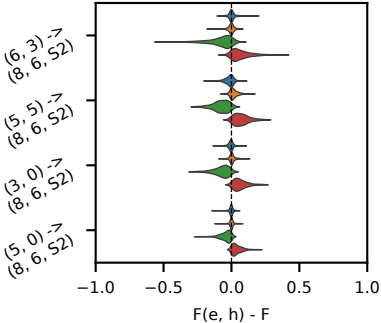

Supplement: supplementary_material [file attachment]

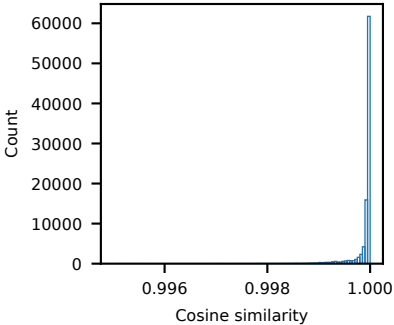

Supplement: supplementary_material [file attachment]

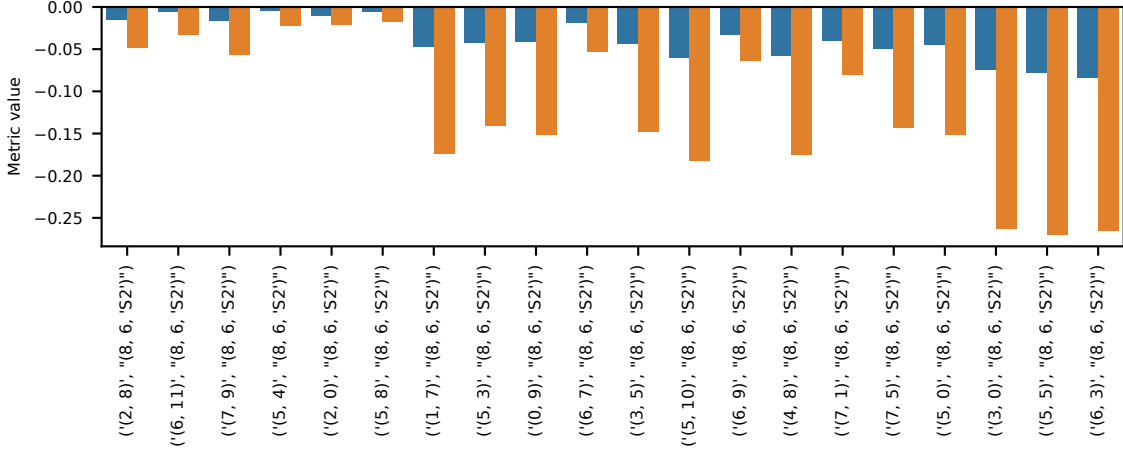

Supplement: supplementary_material [file attachment]

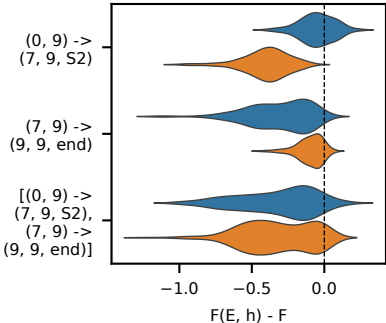

Supplement: supplementary_material [file attachment]

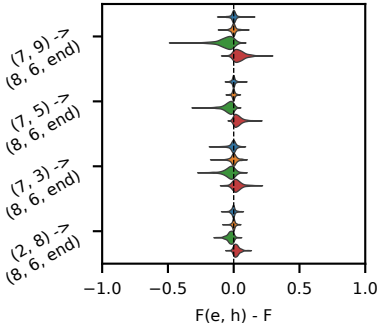

Supplement: supplementary_material [file attachment]

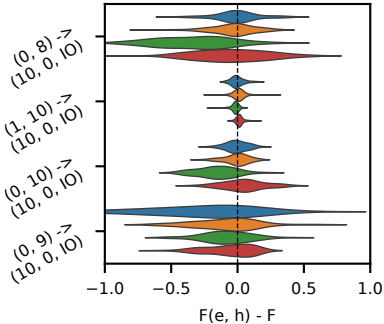

Supplement: supplementary_material [file attachment]

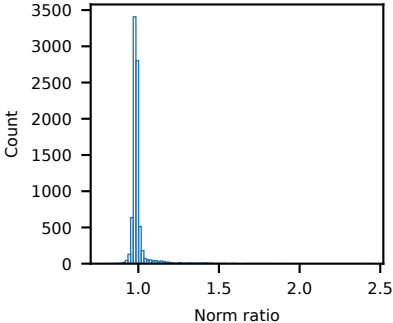

Supplement: supplementary_material [file attachment]

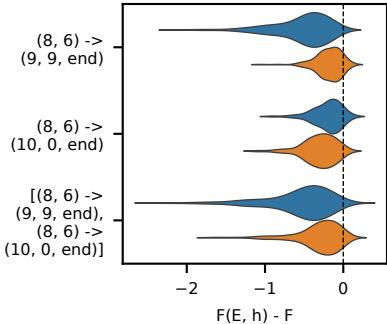

Supplement: supplementary_material [file attachment]

(0, 11) ->  
(7, 9, end)

(7, 9) ->  
(8, 6, end)

[(0, 11) ->  
(7, 9, end),  
(7, 9) ->  
(8, 6, end)]

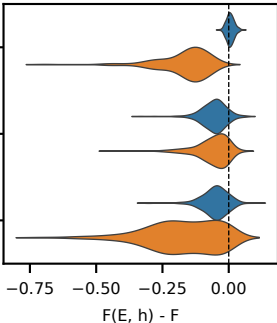

Supplement: supplementary_material [file attachment]

Metric value

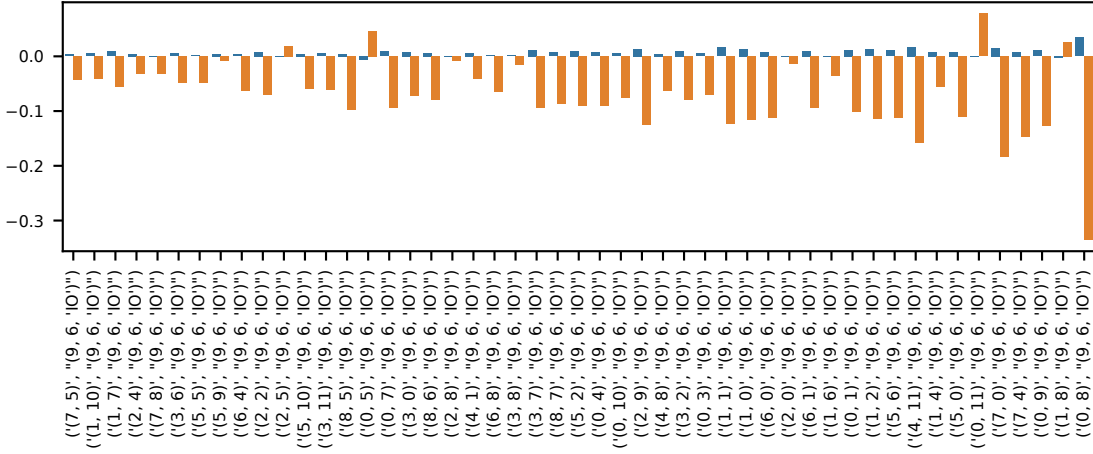

Supplement: supplementary_material [file attachment]

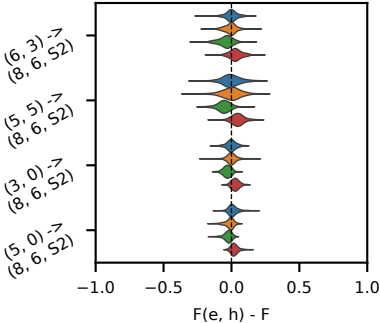

Supplement: supplementary_material [file attachment]

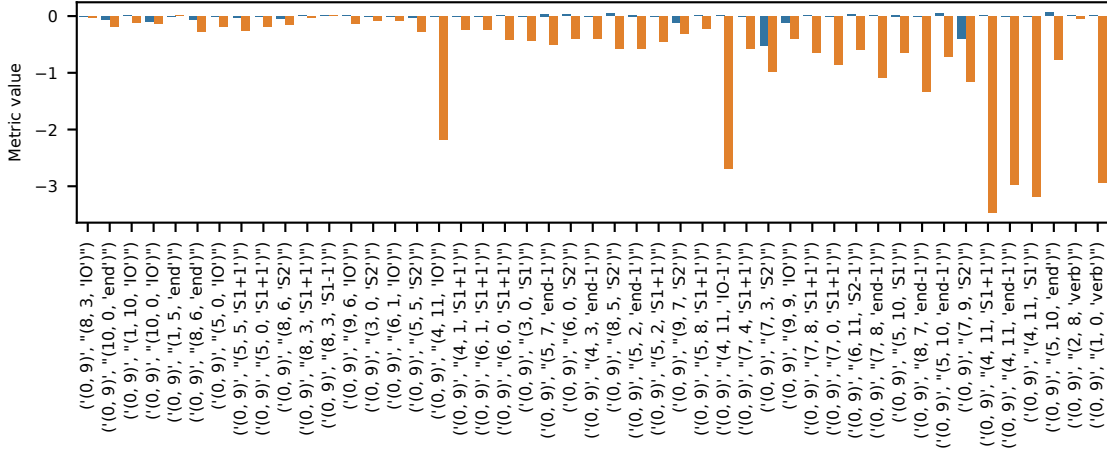

Supplement: supplementary_material [file attachment]

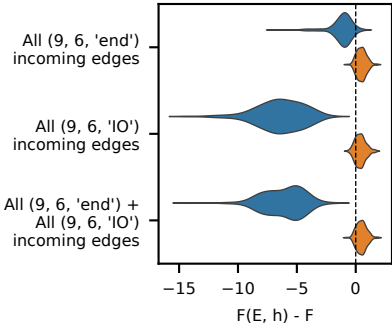

Supplement: supplementary_material [file attachment]

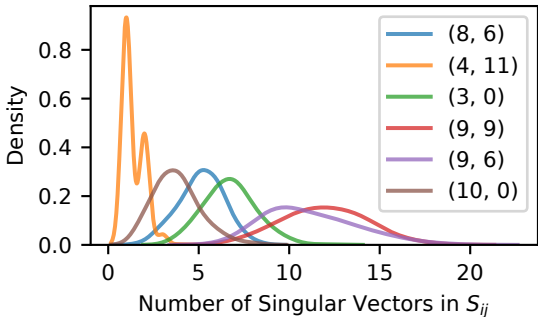

Supplement: supplementary_material [file attachment]
